# Supplementary material
Source: PubMed Central journal article supplement (PMC6703246)
Supplement: Supp_Table2.pdf [file Supp_Table2.pdf]

**Table 2.** Wound closure, granulation tissue thickness, re-epithelization and collagen deposition in wounds of db/+ and db/db mice.

|                                   | CTRL       |            | PIO        |            | GQ-11      |            |
|-----------------------------------|------------|------------|------------|------------|------------|------------|
|                                   | (db/+)     | (db/db)    | (db/+)     | (db/db)    | (db/+)     | (db/db)    |
| Wound closure (%)                 | 83.40±6.1  | 59.83±2.3  | 67.43±19.7 | 60.82±10.2 | 75.79±11.1 | 77.72±6.1  |
| Granulation tissue thickness (mm) | 1.30±0.4   | 0.43±0.3   | 1.29±0.4   | 0.40±0.2   | 1.39±0.3   | 0.71±0.2   |
| Re-epithelization (%)             | 52.87±24.1 | 45.94±19.0 | 62.75±19.6 | 59.69±26.0 | 67.01±23.0 | 83.03±16.2 |
| Collagen deposition (%)           | 5.65±2.3   | 2.05±0.3   | 6.22±2.3   | 1.93±0.62  | 6.75±2.7   | 3.04±0.5   |
